# Supplementary material
Source: PubMed Central journal article supplement (PMC1140425)

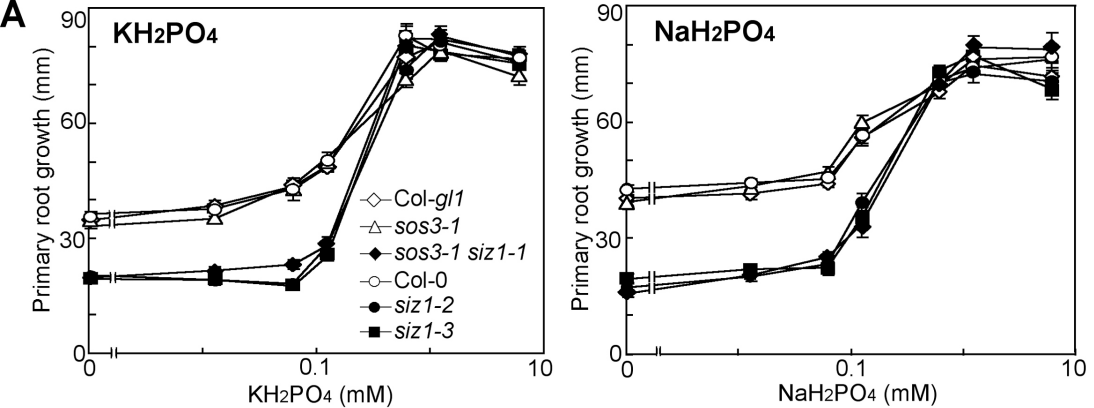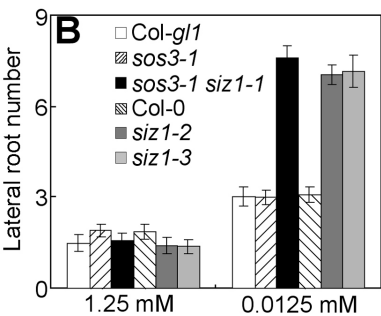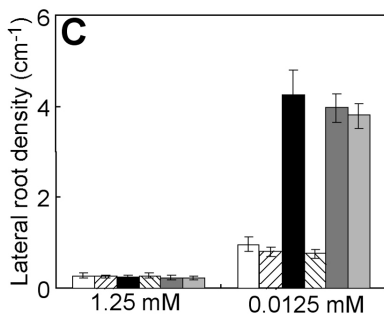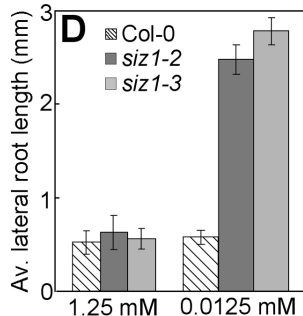

Supplement: pnas_0500778102_1.pdf [file pnas_0500778102_1.pdf]

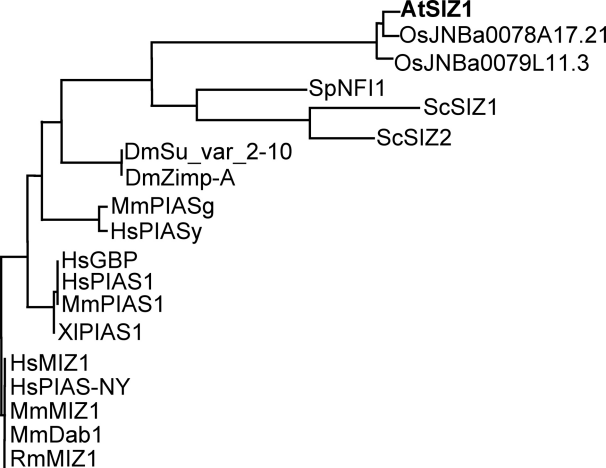

Supplement: pnas_0500778102_2.pdf [file pnas_0500778102_2.pdf]

Light

GFP

Merge

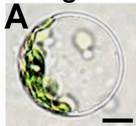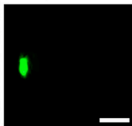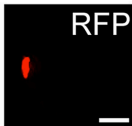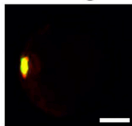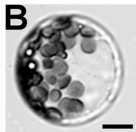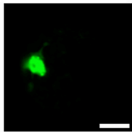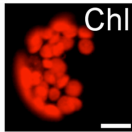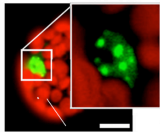

Supplement: pnas_0500778102_3.pdf [file pnas_0500778102_3.pdf]
